# Supplementary material
Source: publisher figshare collection journal article supplement (https://aacr.figshare.com/articles/dataset/_/22528049)

A

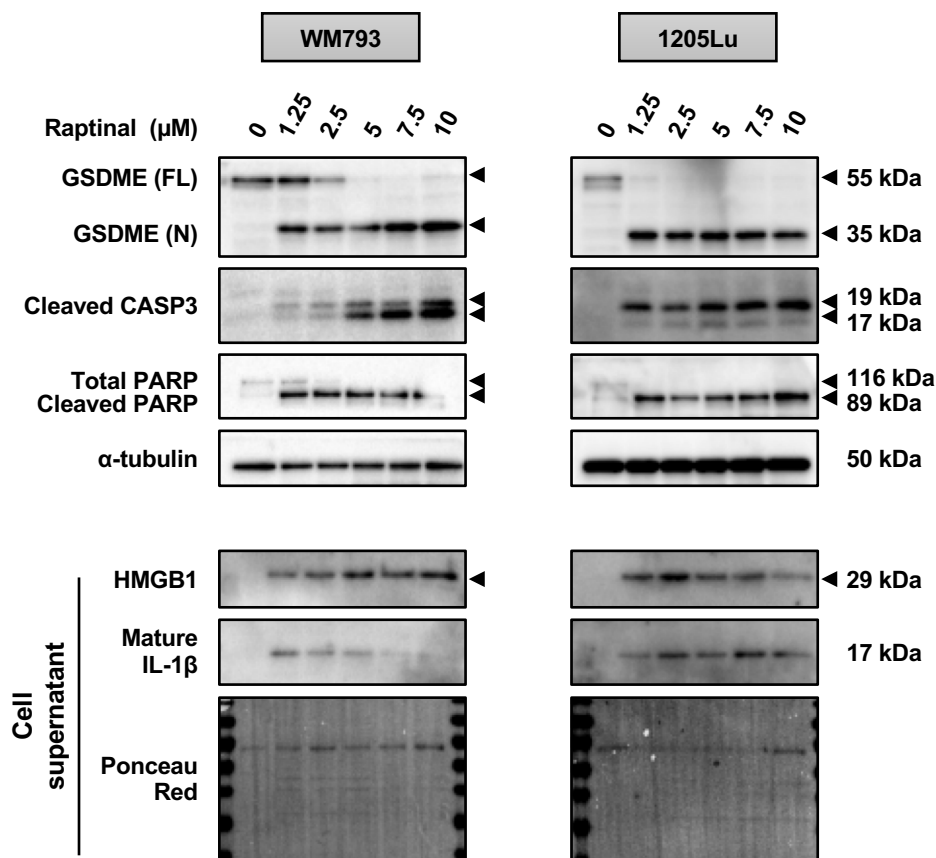

B

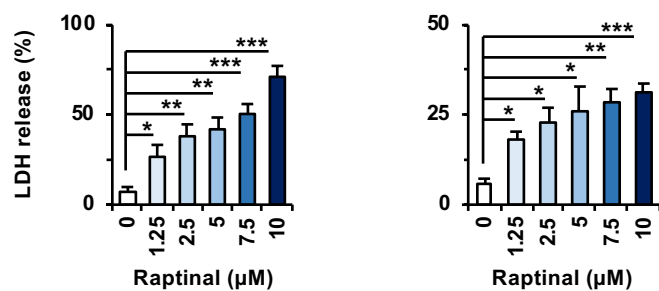

C

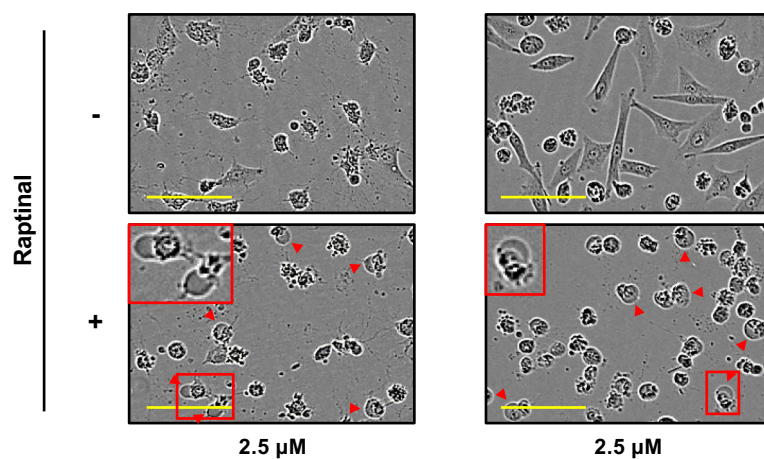

D

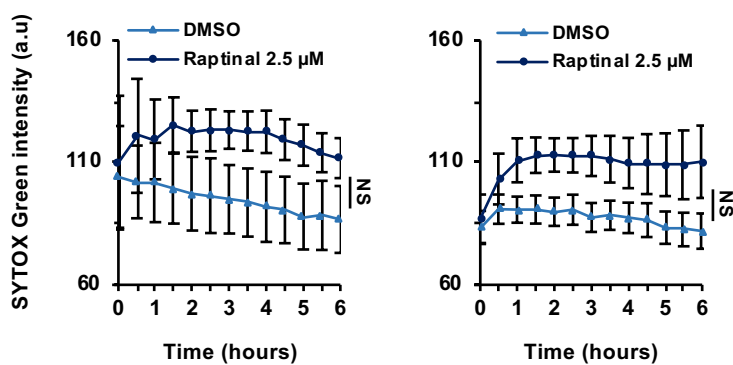

Supplement: Supplementary file 1 [file 39991022]
